# Supplementary material for: The Bcl-2 silencing with an Antisense Oligonucleotide: Increase early Apoptosis
Source: Research Square preprint supplement (doi:10.21203/rs.3.rs-936588/v1), 2021-10-12
Supplement: Supplementary file 1 [file bc366ba7275a3447533e1176.docx]

**Additional files**


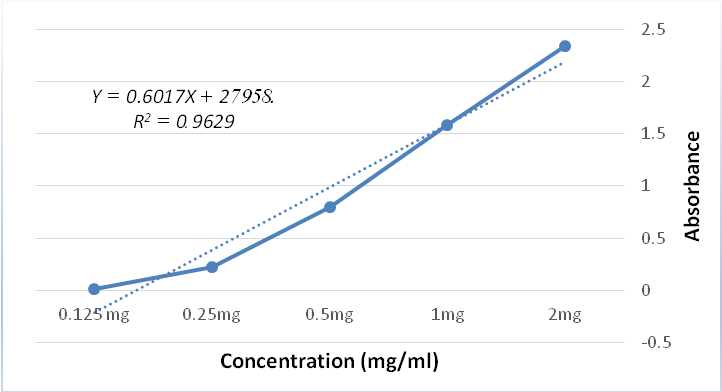


Additional file1: Tamoxifen solubility curve in Methanol

Additional file 2: The Tamoxifen cytotoxicity in the MCF-7 cell line

Additional file 3: The ASO cytotoxicity in the MCF-7 cell line

Additional file 4: The ASO, Niosome and PEI cytotoxicity in the MCF-7 cell line

Additional file 5: The Tamoxifen cytotoxicity in the MDA-MB-231 cell line


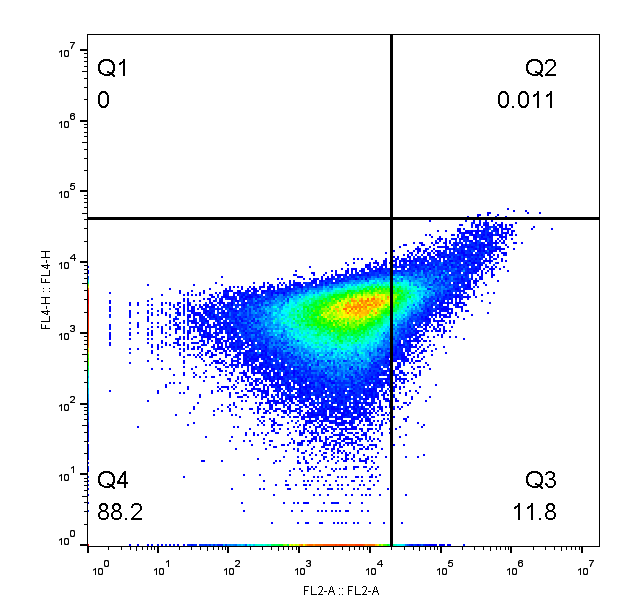


Additional file 6: The Tamoxifen apoptosis in the MDA-MB-231 cell line

Additional file 7: The ASO cytotoxicity in The MDA-MB-231 cell line

Additional file 8: The *Bcl-2* expression level in the MDA-MB-231 cell line after 48 hr with different ASO concentrations (Mean± Standard error, N=3, Statistical significance: P-value *less than 0.05, **less than 0.01, ***less than 0.001).


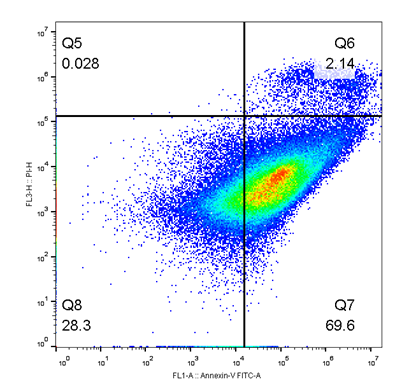


Additional file 9: The ASO apoptosis in The MDA-MB-231 cell line.

Additional file 10: The ASO, Niosome and PEI cytotoxicity in The MDA-MB-231cell line.

Additional file 11: The *Bcl-2* expression level in the MDA-MB-231 cell line after 48 hr with different ASO, Niosome and PEI complex (Mean± Standard error, N=three, Statistical significance: P value *less than 0.05, **less than 0.01, ***less than 0.001).


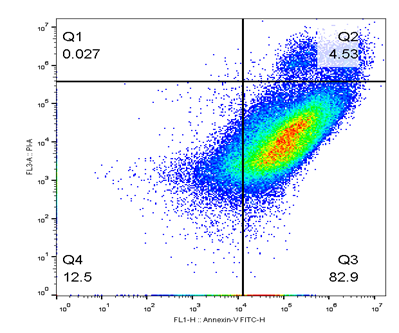


Additional file 12: The ASO, Niosome and PEI apoptosis in the MDA-MB-231cell line


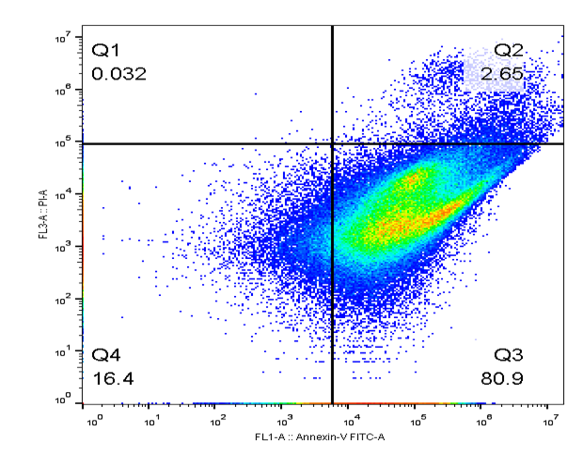


Additional file 13: The ASO and Lipofectamine apoptosis in the MDA-MB-231 cell line.


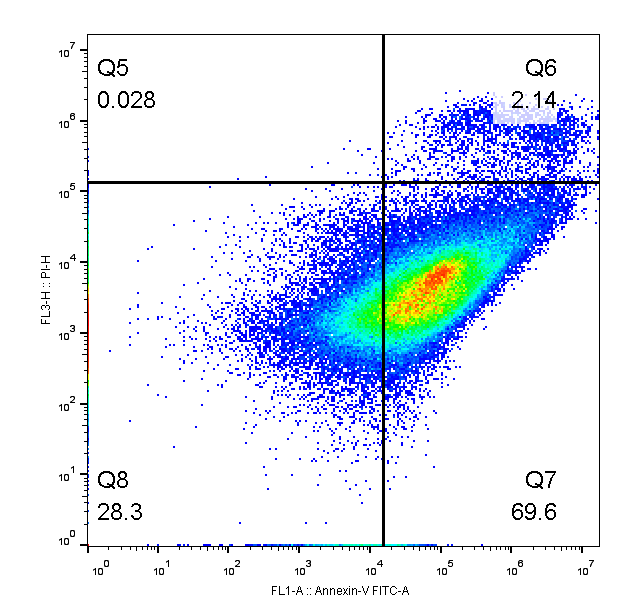


Additional file 14: The ASO and Tamoxifen apoptosis in the MDA-MB-231 cell line.


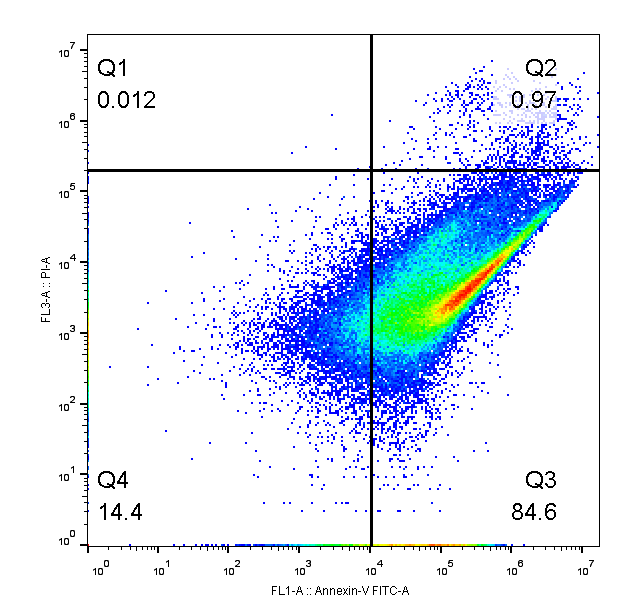


Additional file 15: The ASO, Tamoxifen and Lipofectamine apoptosis in the MDA-MB-231cell line


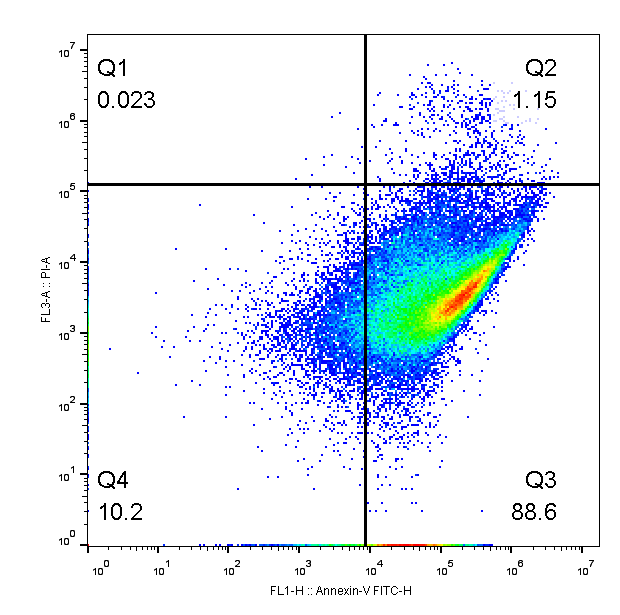


Additional file 16: The ASO, Tamoxifen and Niosome apoptosis in the MDA-MB-231 cell line
